# Supplementary material for: Digital Overload among College Students: Implications for Mental Health App Use
Source: MDPI journal article supplement (doi:10.3390/socsci10080279), 2021-07-21
Supplement: s1 [file s1]

**Table 1.** Participant Characteristics.

| Participant ID | Gender | Race and Ethnicity                                                              | Age | University        | Year in School |
|----------------|--------|---------------------------------------------------------------------------------|-----|-------------------|----------------|
| P1             | Female | Asian or Asian American, White,<br>Native Hawaiian or Other Pacific<br>Islander | 20  | Private Four-Year | Year 3         |
| P2             | Female | American Indian or Alaskan<br>Native, Hispanic or Latino                        | 20  | Public Four-Year  | Year 3         |
| P3             | Female | Asian or Asian American                                                         | 20  | Public Four-Year  | Year 3         |
| P4             | Male   | White                                                                           | 18  | Private Four-Year | Year 1         |
| P5             | Female | Asian or Asian American                                                         | 20  | Private Four-Year | Year 3         |
| P6             | Male   | White                                                                           | 19  | Public Four-Year  | Year 3         |
| P7             | Male   | White                                                                           | 19  | Private Four-Year | Year 2         |
| P8             | Male   | Asian or Asian American, White                                                  | 19  | Private Four-Year | Year 2         |
| P9             | Female | Black or African American                                                       | 18  | Private Four-Year | Year 1         |
| P10            | Female | Black or African American                                                       | 21  | Private Four-Year | Year 4         |
| P11            | Male   | Black or African American                                                       | 20  | Private Four-Year | Year 2         |
| P12            | Female | Black or African American                                                       | 20  | Private Four-Year | Year 3         |
